# Supplementary material
Source: PubMed Central journal article supplement (PMC3479371)

**Figure S1****A**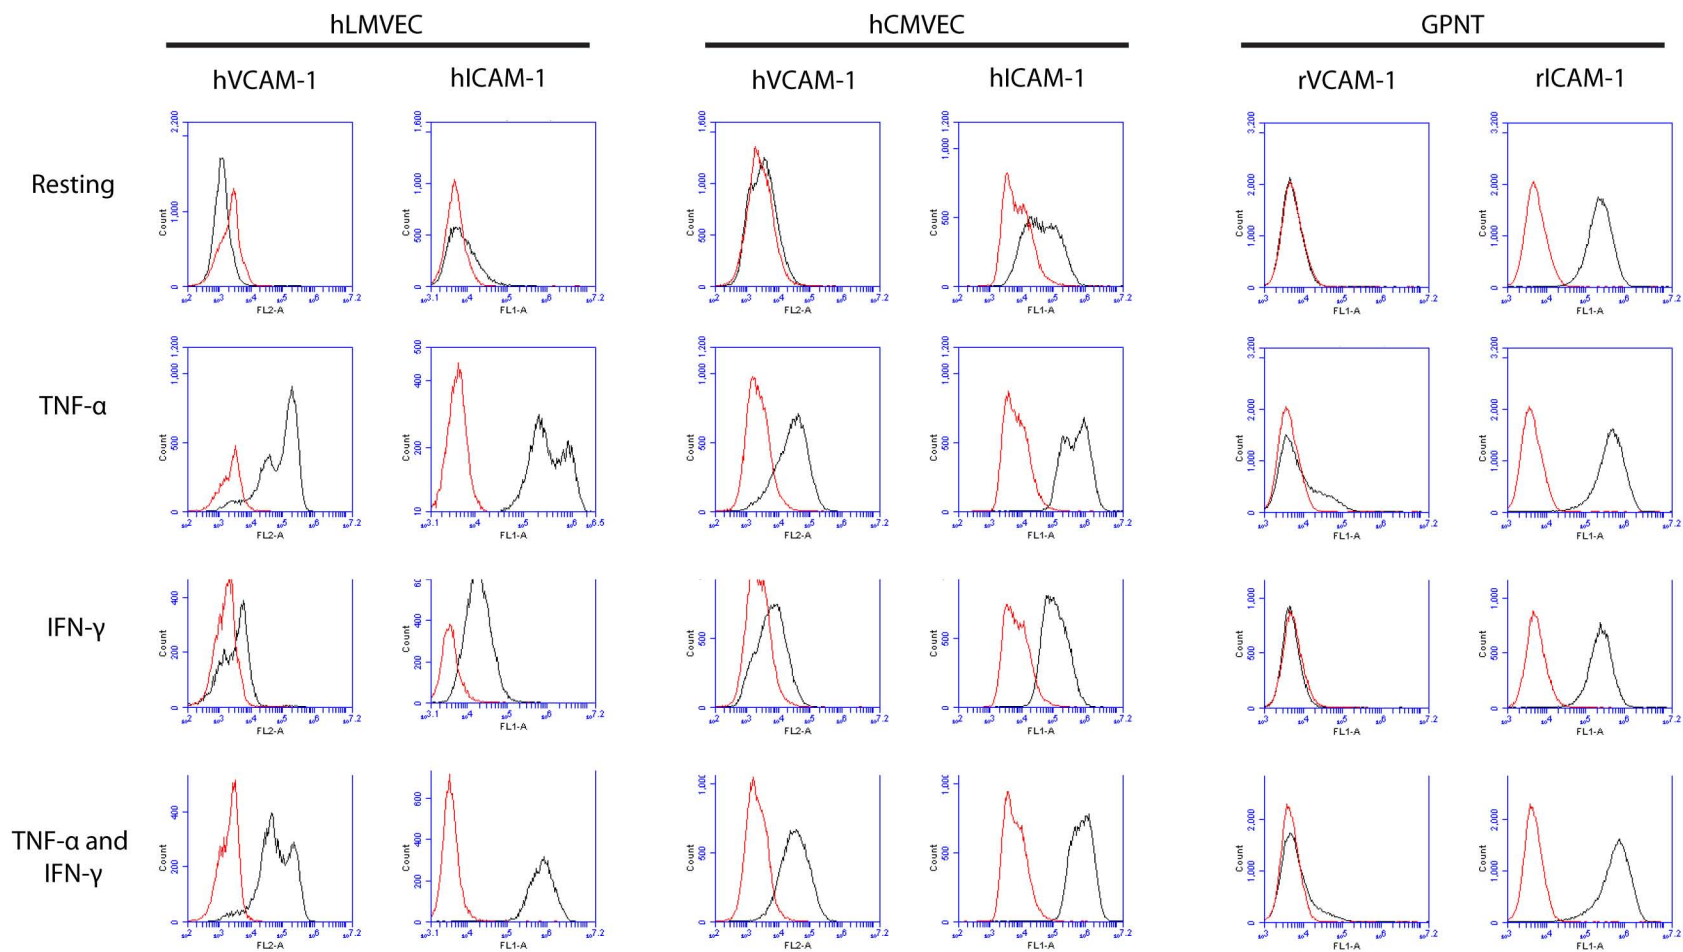**Bi**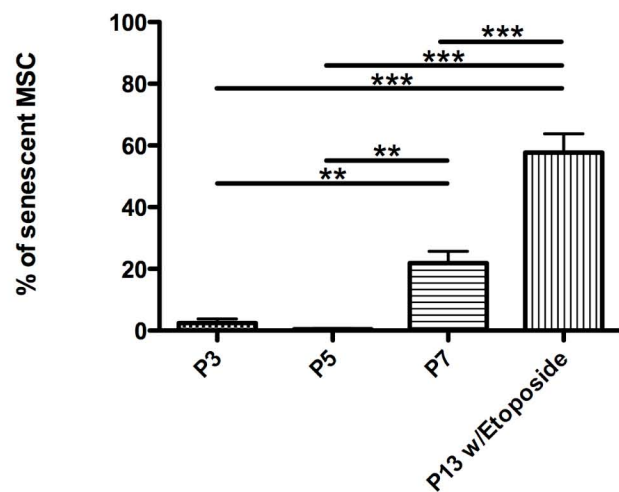**Bii**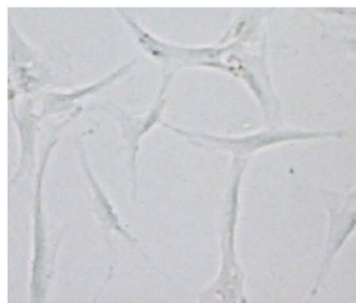**Biii**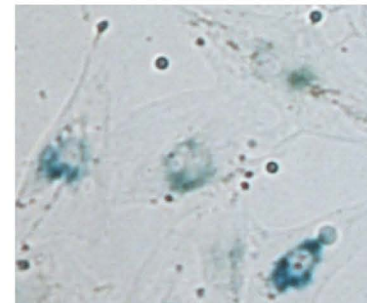

# Figure S2

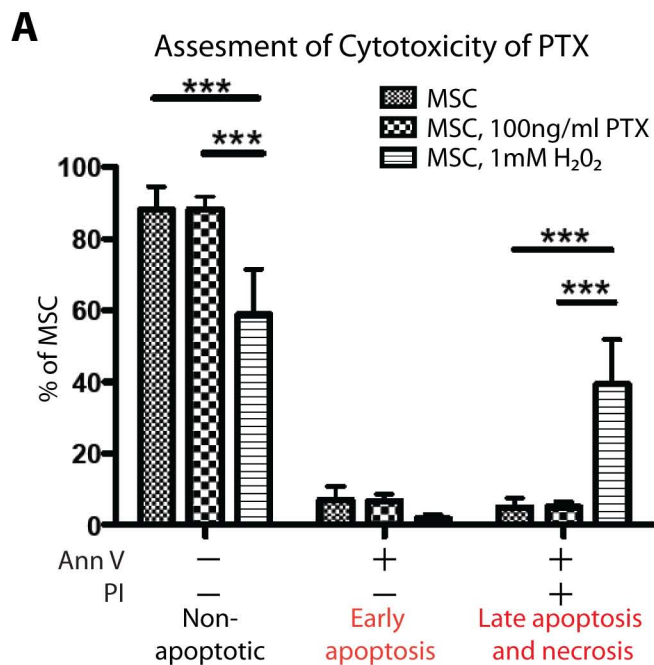

**B** Effect of Cytokine Pretreatment of GPNT EC on MSC Adhesion & Transmigration

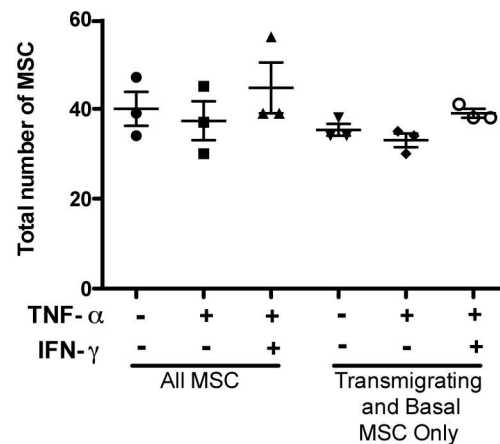

**C** Blockade of MSC Adhesion to EC

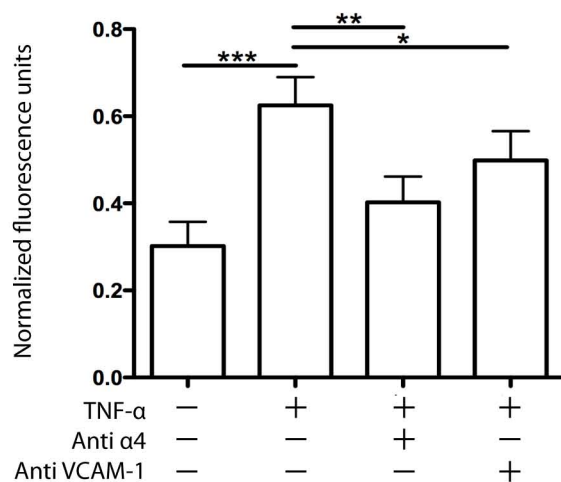

**D** Integrin Subunit Expression on MSC

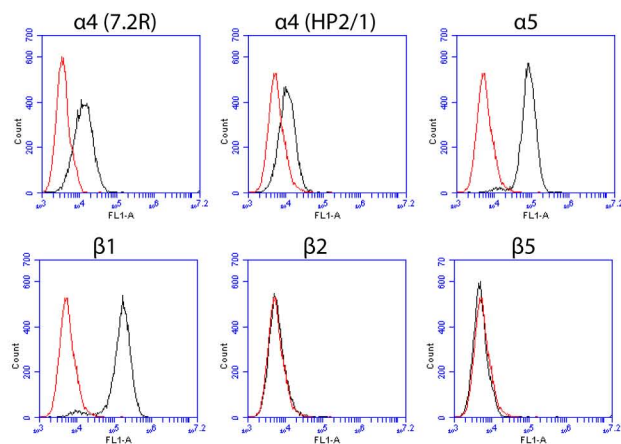

**Figure S3****A**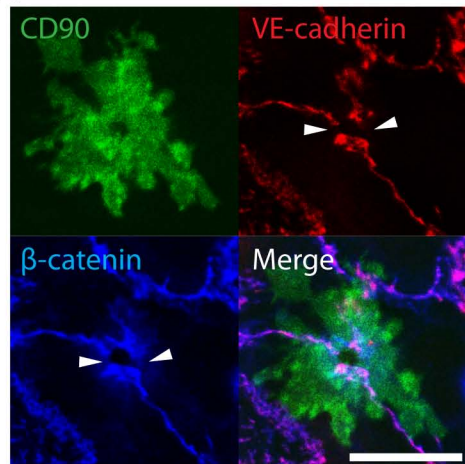**Bi**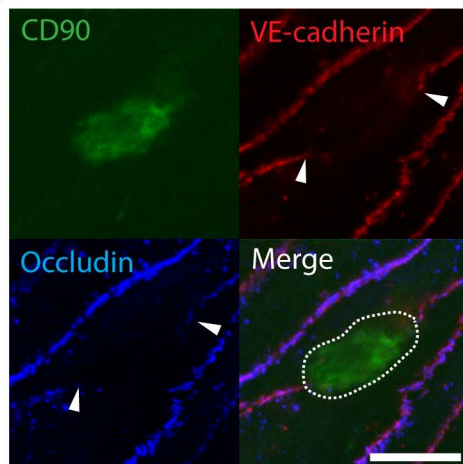**Bii**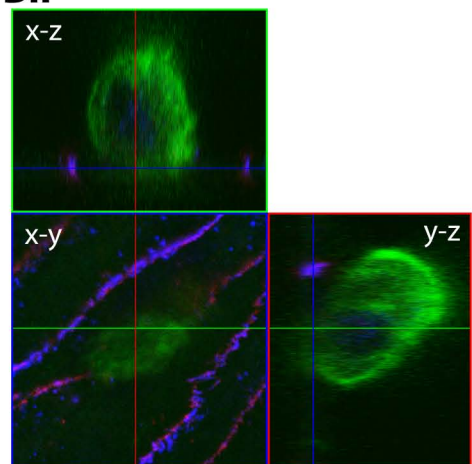**Ci**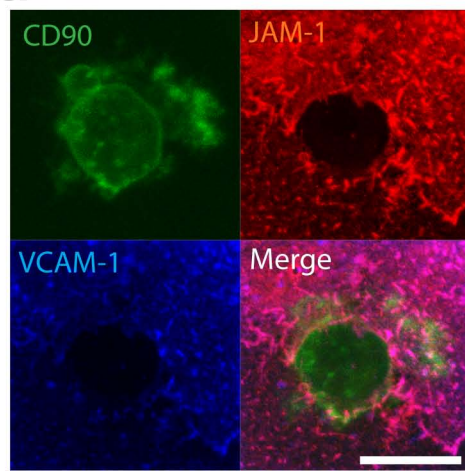**Cii**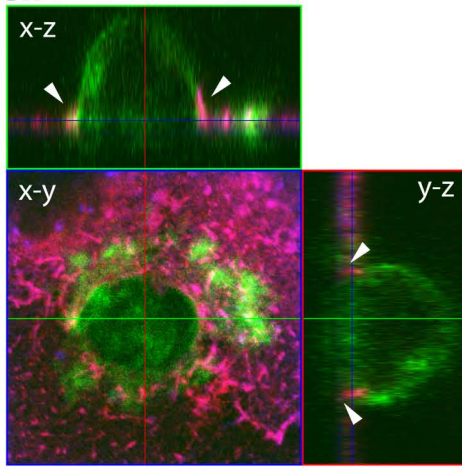

Supplement: NIHMS398936-supplement-Supp_Fig_S1-S3.pdf [file NIHMS398936-supplement-Supp_Fig_S1-S3.pdf]
